# Supplementary material for: Machine learning approaches toward an understanding of acute kidney injury: current trends and future directions
Source: PubMed Central journal article supplement — Korean J Intern Med. 2024 Oct 29;39(6):882–97. doi: 10.3904/kjim.2024.098 (PMC11569930; doi:10.3904/kjim.2024.098), 2024-10-29
Supplement: kjim-2024-098-Supplementary-Table-1.pdf [file kjim-2024-098-Supplementary-Table-1.pdf]

**Supplementary Table 1. Summary of artificial intelligence in AKI assessment papers**

| Ref  | Year | Task                                                 | Baseline Cr                                                                                                                  | Methods for handling missing data                                                                                             | Model    | AUROC | Presentation of missing data proportion | Using of public datasets | Real-time prediction | External validation |
|------|------|------------------------------------------------------|------------------------------------------------------------------------------------------------------------------------------|-------------------------------------------------------------------------------------------------------------------------------|----------|-------|-----------------------------------------|--------------------------|----------------------|---------------------|
|      |      |                                                      | AKI definition                                                                                                               |                                                                                                                               |          |       |                                         |                          |                      |                     |
| [S1] | 2015 | AKI within 2 to 9 days after admission               | Average values within 7 to 365 days prior to admission<br>KDIGO without UO                                                   | Median imputation was used                                                                                                    | LR       | 0.83  | O                                       | X                        | X                    | X                   |
| [S2] | 2018 | AKI at various periods after admission               | The last measured value within 2 days prior to admission or the first measurement during hospitalization<br>KDIGO without UO | Removed                                                                                                                       | RF       | 0.77  | X                                       | X                        | △                    | X                   |
| [S3] | 2018 | AKI within 2 days post-liver transplantation         | The most recent value measured before the surgery<br>AKIN without UO                                                         | For less than 1% missing, the mean and median of continuous variables; for less than 5% missing, hot-deck imputation was used | GBM      | 0.90  | O                                       | X                        | X                    | X                   |
| [S4] | 2019 | AKI at various periods after admission               | The last measured value within 2 days before admission or the first measurement after admission<br>KDIGO without UO          | Missing indicator was used                                                                                                    | Ensemble | 0.74  | X                                       | X                        | △                    | X                   |
| [S5] | 2020 | AKI and RRT within 48 hours in hospitalized patients | The first value measured at the time of admission<br>KDIGO without UO                                                        | After replacing with the most recent value, imputation with the median or mode was used                                       | GBM      | 0.86  | X                                       | X                        | O                    | O                   |
| [S6] | 2020 | AKI within 7 days after aortic arch surgery          | The most recent value before surgery<br>KDIGO without UO                                                                     | Removed                                                                                                                       | LGBM     | 0.83  | O                                       | X                        | X                    | X                   |
| [S7] | 2020 | AKI within 7 days after cardiac surgery              | The last measured value before surgery<br>KDIGO without UO                                                                   | Replaced by mean and mode values                                                                                              | Ensemble | 0.84  | O                                       | X                        | X                    | X                   |
| [S8] | 2020 | AKI within 7 days after partial nephrectomy          | Not clearly stated<br>KDIGO with UO                                                                                          | Not clearly stated                                                                                                            | XGB      | 0.74  | X                                       | X                        | X                    | X                   |

Supplementary Table 1. Continued

| Ref   | Year | Task                                                                                                         | Baseline Cr                                                                                             | Methods for handling missing data                                                         | Model    | AUROC | Presentation of missing data proportion | Using of public datasets | Real-time prediction | External validation |
|-------|------|--------------------------------------------------------------------------------------------------------------|---------------------------------------------------------------------------------------------------------|-------------------------------------------------------------------------------------------|----------|-------|-----------------------------------------|--------------------------|----------------------|---------------------|
|       |      |                                                                                                              | AKI definition                                                                                          |                                                                                           |          |       |                                         |                          |                      |                     |
| [S9]  | 2020 | AKI after ICU admission                                                                                      | Average value within 7 to 180 days before admission<br>KDIGO with UO                                    | Replaced with mean values                                                                 | GBM      | 0.69  | X                                       | X                        | X                    | O                   |
| [S10] | 2022 | AKI in patients undergoing knee arthroplasty                                                                 | The last measured value within 6 months before surgery<br>KDIGO without UO                              | Model's own algorithm was used                                                            | GBM      | 0.78  | O                                       | X                        | X                    | O                   |
| [S11] | 2021 | Survival within 1, 5, 17 years after kidney transplantation                                                  | Not clearly stated                                                                                      | Removed                                                                                   | SVM      | 0.82  | X                                       | X                        | X                    | X                   |
| [S12] | 2021 | AKI within 72 hours after ICU admission                                                                      | The minimum value on the first day of admission<br>KDIGO with UO                                        | After removing rows with more than 50%, MICE was used                                     | LGBM     | 0.90  | X                                       | O                        | X                    | X                   |
| [S13] | 2021 | AKI within 48 hours in PICU                                                                                  | Average considering age and gender<br>KDIGO without UO                                                  | No missing values                                                                         | Ensemble | 0.89  | X                                       | X                        | O                    | O                   |
| [S14] | 2021 | AKI associated with cardiac surgery (duration not specified)                                                 | Not clearly stated<br>Post-surgery SCr exceeding 2.26 mg/dL, doubling or more from the baseline, or RRT | After excluding features with more than 5%, patients with any missing values were removed | GBM      | 0.85  | O                                       | X                        | X                    | X                   |
| [S15] | 2021 | AKI within 7 days after nephrectomy in patients with renal cell carcinoma                                    | Measured value before surgery (not clearly stated)<br>KDIGO without UO                                  | Not clearly stated                                                                        | LGBM     | 0.81  | X                                       | X                        | X                    | X                   |
| [S16] | 2021 | Recovery of AKI within 48 hours in patients who developed AKI within 48 hours after ICU admission for sepsis | The minimum value during 7 days before admission<br>KDIGO with UO                                       | After excluding features with more than 30%, MissForest was used                          | ANN      | 0.76  | O                                       | O                        | X                    | X                   |

Supplementary Table 1. Continued

| Ref   | Year | Task                                                                                              | Baseline Cr                                                                                                                                  | Methods for handling missing data                                                                                   | Model | AUROC | Presentation of missing data proportion | Using of public datasets | Real-time prediction | External validation |
|-------|------|---------------------------------------------------------------------------------------------------|----------------------------------------------------------------------------------------------------------------------------------------------|---------------------------------------------------------------------------------------------------------------------|-------|-------|-----------------------------------------|--------------------------|----------------------|---------------------|
|       |      |                                                                                                   | AKI definition                                                                                                                               |                                                                                                                     |       |       |                                         |                          |                      |                     |
| [S17] | 2022 | Severe AKI within 48 hours in the ICU                                                             | Not clearly stated<br>KDIGO (AKI if stage II or III criteria are met, negative for the rest)                                                 | After removing features with more than 50%, 30-50% were checked with specialist and MICE was used for less than 30% | XGB   | 0.86  | X                                       | O                        | O                    | O                   |
| [S18] | 2022 | Prediction of progression from AKI stages 1/2 to AKI 3 in ICU patients                            | Not clearly stated<br>KDIGO with UO                                                                                                          | After removing features with more than 70%, XGBoost's internal method was used                                      | XGB   | 0.93  | X                                       | O                        | X                    | X                   |
| [S19] | 2022 | AKI within 7 days after cardiac surgery                                                           | The first measured value at hospital admission<br>KDIGO without UO                                                                           | Some were filled in upon review, and multiple imputation was used for the remaining                                 | DF    | 0.88  | X                                       | X                        | X                    | X                   |
| [S20] | 2022 | AKI within 7 days after cardiac surgery                                                           | The first measured value at hospital admission<br>KDIGO without UO                                                                           | Not clearly stated                                                                                                  | RF    | 0.74  | X                                       | X                        | X                    | X                   |
| [S21] | 2022 | AKI within 7 days after liver transplantation in patients                                         | The most recent value within 3 months before hospital admission, or the first measured value upon admission<br>International Club of Ascites | Not clearly stated                                                                                                  | ANN   | 0.81  | X                                       | X                        | X                    | X                   |
| [S22] | 2022 | Mortality during hospital stay in patients who developed AKI within 24 hours after ICU admission  | The minimum value within 7 days<br>KDIGO with UO                                                                                             | After removing features with more than 20%, multiple imputation was used                                            | XGB   | 0.89  | O                                       | O                        | X                    | X                   |
| [S23] | 2022 | Recovery of AKI within 72 hours in patients who developed AKI within 48 hours after ICU admission | Not clearly stated                                                                                                                           | Not clearly stated                                                                                                  | RF    | 0.77  | O                                       | X                        | X                    | X                   |

Supplementary Table 1. Continued

| Ref   | Year | Task                                                                                                     | Baseline Cr                                                                                                                                                  | Methods for handling missing data                                                                                               | Model    | AUROC        | Presentation of missing data proportion | Using of public datasets | Real-time prediction | External validation |
|-------|------|----------------------------------------------------------------------------------------------------------|--------------------------------------------------------------------------------------------------------------------------------------------------------------|---------------------------------------------------------------------------------------------------------------------------------|----------|--------------|-----------------------------------------|--------------------------|----------------------|---------------------|
|       |      |                                                                                                          | AKI definition                                                                                                                                               |                                                                                                                                 |          |              |                                         |                          |                      |                     |
| [S24] | 2021 | Oliguric AKI stages 2/3 in ICU                                                                           | The minimum available value during the hospital stay or the most recent value within 4 days<br>KDIGO with UO                                                 | Only urine volume and SCr were used, with SCr being the same as baseline and urine volume was calculated using a 9-hour average | ANN      | 0.91         | O                                       | X                        | O                    | O                   |
| [S25] | 2022 | Mortality during hospital stay in ICU patients over 60 years with AKD                                    | The minimum value during the hospital stay or estimated value<br>KDIGO with UO                                                                               | Not clearly stated                                                                                                              | XGB      | 0.90         | O                                       | X                        | X                    | O                   |
| [S26] | 2022 | AKI in patients hospitalized for acute pancreatitis                                                      | Not clearly stated<br>KDIGO with UO                                                                                                                          | Not clearly stated                                                                                                              | RF       | 0.91         | X                                       | X                        | X                    | △                   |
| [S27] | 2022 | AKI after orthopedic surgery in elderly patients                                                         | The most recent value before surgery<br>KDIGO without UO                                                                                                     | Not clearly stated                                                                                                              | LR       | 0.82         | X                                       | X                        | X                    | X                   |
| [S28] | 2022 | Persistent AKI in patients who developed AKI after surgery in ICU                                        | The minimum value within 6 months before ICU admission or estimated value<br>KDIGO without UO                                                                | After removing features with more than 20%, multiple imputation was used                                                        | Emsemble | 0.86         | O                                       | X                        | X                    | O                   |
| [S29] | 2022 | AKI in ICU for sepsis                                                                                    | Not clearly stated<br>KDIGO with UO                                                                                                                          | After removing features with more than 20%, multiple imputation was used                                                        | XGB      | 0.82         | O                                       | X                        | X                    | X                   |
| [S30] | 2021 | Occurrence and recovery of AKI stages 2/3 in all patients                                                | The minimum SCr during hospital stay<br>KDIGO without UO (not clear)                                                                                         | Model's own algorithm was used                                                                                                  | XGB      | Not reported | X                                       | O                        | X                    | X                   |
| [S31] | 2023 | Prediction of AKI stages 2/3 and AKI stage 3 after the initial 12 hours following Mechanical Ventilation | The average value before ICU admission or using the first measured value upon ICU admission<br>KDIGO without UO (excluding criteria for acute dialysis, RRT) | Not clearly stated                                                                                                              | RF       | 0.82         | O                                       | O                        | O                    | O                   |

Supplementary Table 1. Continued

| Ref   | Year | Task                                                                                                                                                                  | Baseline Cr                                                                                                                       | Methods for handling missing data                                         | Model | AUROC | Presentation of missing data proportion | Using of public datasets | Real-time prediction | External validation |
|-------|------|-----------------------------------------------------------------------------------------------------------------------------------------------------------------------|-----------------------------------------------------------------------------------------------------------------------------------|---------------------------------------------------------------------------|-------|-------|-----------------------------------------|--------------------------|----------------------|---------------------|
|       |      |                                                                                                                                                                       | AKI definition                                                                                                                    |                                                                           |       |       |                                         |                          |                      |                     |
| [S32] | 2024 | Progression of AKI stages in patients who experienced AKI within 48 hours after cardiac surgery and received furosemide injection within 24 hours after AKI diagnosis | The minimum measured value within 3 months before cardiac surgery, excluding undefined patients<br>KDIGO with UO                  | Multiple imputation was used                                              | LR    | 0.81  | O                                       | X                        | X                    | X                   |
| [S33] | 2023 | Recovery of renal function within 1 year after utilizing RS in AKD patients                                                                                           | The minimum measured value within 365 days before RS, excluding undefined patients<br>KDIGO without UO                            | Not clearly stated                                                        | RS    | 0.74  | X                                       | O                        | X                    | X                   |
| [S34] | 2024 | AKI within 7 days in lymphoma patients treated with methotrexate                                                                                                      | The most recent value measured within 72 hours before medication administration, excluding undefined patients<br>KDIGO without UO | Not clearly stated                                                        | LASSO | 0.72  | X                                       | X                        | X                    | X                   |
| [S35] | 2023 | Prediction of stage 2 or higher AKI on the third day of hospitalization in pediatric ICU patients using RAI                                                           | The minimum value within 90 days before ICU admission or estimated value<br>KDIGO with UO                                         | Not clearly stated                                                        | RAI   | 0.77  | X                                       | X                        | X                    | X                   |
| [S36] | 2023 | AKI from 24 hours after admission until discharge in ICU-admitted patients with cirrhosis                                                                             | Measured value within 7 days before ICU admission or the first measured value after ICU admission<br>KDIGO with UO                | After removing features with more than 80%, linear interpolation was used | ANN   | 0.76  | O                                       | X                        | X                    | O                   |

Supplementary Table 1. Continued

| Ref   | Year | Task                                                                                                                    | Baseline Cr                                                                      | Methods for handling missing data                                        | Model | AUROC | Presentation of missing data proportion | Using of public datasets | Real-time prediction | External validation |
|-------|------|-------------------------------------------------------------------------------------------------------------------------|----------------------------------------------------------------------------------|--------------------------------------------------------------------------|-------|-------|-----------------------------------------|--------------------------|----------------------|---------------------|
|       |      |                                                                                                                         | AKI definition                                                                   |                                                                          |       |       |                                         |                          |                      |                     |
| [S37] | 2023 | Mortality within 30 days, AKI recovery within 30 days, and AKI recovery within 90 days in AKI patients who received RRT | Not clearly stated<br>KDIGO with UO                                              | Not clearly stated                                                       | RF    | 0.67  | X                                       | X                        | X                    | X                   |
| [S38] | 2023 | Mortality within 7, 14, 28 days in patients who developed AKI within 24 hours after admission for sepsis to the ICU     | Measured value before admission or the first value at admission<br>KDIGO with UO | After removing features with more than 30%, multiple imputation was used | XGB   | 0.91  | O                                       | O                        | X                    | O                   |
| [S39] | 2023 | Mortality during hospital stay in patients who developed AKI within 48 hours after ICU admission for sepsis             | Measured value before admission or the first value at admission<br>KDIGO with UO | Multiple imputation was used                                             | XGB   | 0.79  | O                                       | O                        | X                    | X                   |
| [S40] | 2023 | AKI in patients who developed ARDS on the first day after ICU admission                                                 | Applying ICD codes                                                               | After removing features with more than 20%, multiple imputation was used | XGB   | 0.87  | O                                       | X                        | X                    | X                   |
| [S41] | 2023 | Mortality within 28 days in patients who developed AKI on the first day after ICU admission for sepsis                  | Not clearly stated<br>KDIGO with UO                                              | After removing features with more than 20%, MissForest was used          | XGB   | 0.87  | X                                       | O                        | X                    | X                   |
| [S42] | 2023 | Occurrence of stage 3 or higher AKI in TBI patients                                                                     | Not clearly stated<br>KDIGO with UO                                              | Multiple imputation was used                                             | RF    | 0.82  | O                                       | O                        | X                    | O                   |

Supplementary Table 1. Continued

| Ref   | Year | Task                                                                     | Baseline Cr                             | Methods for handling missing data | Model    | AUROC | Presentation of missing data proportion | Using of public datasets | Real-time prediction | External validation |
|-------|------|--------------------------------------------------------------------------|-----------------------------------------|-----------------------------------|----------|-------|-----------------------------------------|--------------------------|----------------------|---------------------|
|       |      |                                                                          | AKI definition                          |                                   |          |       |                                         |                          |                      |                     |
| [S43] | 2024 | Occurrence of stage 2 or higher AKI in septic patients with hypertension | Not clearly stated<br><br>KDIGO with UO | Not clearly stated                | Nomogram | 0.82  | X                                       | X                        | X                    | X                   |

AKI, acute kidney injury; Cr, creatinine; AUROC, area under the receiver operating characteristic curve; KDIGO, Kidney Disease: Improving Global Outcomes; UO, urine output; LR, logistic regression; RF, random forest; AKIN, acute kidney injury network; GBM, gradient boosting machine; RRT, renal replacement therapy; LGBM, light gradient boosting machine; XGB, extreme gradient boosting; ICU, intensive care unit; SVM, support vector machine; PICU, pediatric intensive care unit; MICE, multiple imputation by chained equations; DF, deep forest; ANN, artificial neural network; SCr, serum creatinine; AKD, acute kidney disease; RS, renal scintigraphy; LASSO, least absolute shrinkage and selection operator; RAI, renal angina index; ARDS, acute respiratory distress syndrome; ICD, International Classification of Diseases; TBI, traumatic brain injury; eGFR, estimated glomerular filtration rate.

“Estimated value” refers to the estimation of parameters, such as eGFR, using methods like modification of diet in renal disease when baseline is unavailable. “△” signifies insufficient information for assessment. “Ensemble” refers to the combination of individual models through methods like voting, each developed separately.

## SUPPLEMENTARY REFERENCES

- S1. Cronin RM, VanHouten JP, Siew ED, et al. National Veterans Health Administration inpatient risk stratification models for hospital-acquired acute kidney injury. *J Am Med Inform Assoc* 2015;22:1054-1071.
- S2. Cheng P, Waitman LR, Hu Y, Liu M. Predicting inpatient acute kidney injury over different time horizons: how early and accurate? *AMIA Annu Symp Proc* 2018;2017:565-574.
- S3. Lee HC, Yoon SB, Yang SM, et al. Prediction of acute kidney injury after liver transplantation: machine learning approaches vs. logistic regression model. *J Clin Med* 2018;7:428.
- S4. He J, Hu Y, Zhang X, Wu L, Waitman LR, Liu M. Multi-perspective predictive modeling for acute kidney injury in general hospital populations using electronic medical records. *JAMIA Open* 2019;2:115-122.
- S5. Churpek MM, Carey KA, Edelson DP, et al. Internal and external validation of a machine learning risk score for acute kidney injury. *JAMA Netw Open* 2020;3:e2012892.
- S6. Lei G, Wang G, Zhang C, Chen Y, Yang X. Using machine learning to predict acute kidney injury after aortic arch surgery. *J Cardiothorac Vasc Anesth* 2020;34:3321-3328.
- S7. Tseng PY, Chen YT, Wang CH, et al. Prediction of the development of acute kidney injury following cardiac surgery by machine learning. *Crit Care* 2020;24:478.
- S8. Zhu K, Song H, Zhang Z, et al. Acute kidney injury in solitary kidney patients after partial nephrectomy: incidence, risk factors and prediction. *Transl Androl Urol* 2020;9:1232-1243.
- S9. Shawwa K, Ghosh E, Lanius S, Schwager E, Eshelman L, Kashani KB. Predicting acute kidney injury in critically ill patients using comorbid conditions utilizing machine learning. *Clin Kidney J* 2020;14:1428-1435.
- S10. Ko S, Jo C, Chang CB, et al. A web-based machine-learning algorithm predicting postoperative acute kidney injury after total knee arthroplasty. *Knee Surg Sports Traumatol Arthrosc* 2022;30:545-554.
- S11. Naqvi SAA, Tennankore K, Vinson A, Roy PC, Abidi SSR. Predicting kidney graft survival using machine learning methods: prediction model development and feature significance analysis study. *J Med Internet Res* 2021;23:e26843.
- S12. Qian Q, Wu J, Wang J, Sun H, Yang L. Prediction models for AKI in ICU: a comparative study. *Int J Gen Med* 2021;14:623-632.
- S13. Dong J, Feng T, Thapa-Chhetry B, et al. Machine learning model for early prediction of acute kidney injury (AKI) in pediatric critical care. *Crit Care* 2021;25:288.

- S14. Penny-Dimri JC, Bergmeir C, Reid CM, Williams-Spence J, Cochrane AD, Smith JA. Machine learning algorithms for predicting and risk profiling of cardiac surgery-associated acute kidney injury. *Semin Thorac Cardiovasc Surg* 2021;33:735-745.
- S15. Lee Y, Ryu J, Kang MW, et al. Machine learning-based prediction of acute kidney injury after nephrectomy in patients with renal cell carcinoma. *Sci Rep* 2021;11:15704.
- S16. Luo XQ, Yan P, Zhang NY, et al. Machine learning for early discrimination between transient and persistent acute kidney injury in critically ill patients with sepsis. *Sci Rep* 2021;11:20269.
- S17. Liang Q, Xu Y, Zhou Y, et al. Severe acute kidney injury predicting model based on transcontinental databases: a single-centre prospective study. *BMJ Open* 2022;12:e054092.
- S18. Wei C, Zhang L, Feng Y, Ma A, Kang Y. Machine learning model for predicting acute kidney injury progression in critically ill patients. *BMC Med Inform Decis Mak* 2022;22:17.
- S19. Zhang H, Wang Z, Tang Y, et al. Prediction of acute kidney injury after cardiac surgery: model development using a Chinese electronic health record dataset. *J Transl Med* 2022;20:166.
- S20. Petrosyan Y, Mesana TG, Sun LY. Prediction of acute kidney injury risk after cardiac surgery: using a hybrid machine learning algorithm. *BMC Med Inform Decis Mak* 2022;22:137.
- S21. Bredt LC, Peres LAB, Risso M, Barros LCAL. Risk factors and prediction of acute kidney injury after liver transplantation: logistic regression and artificial neural network approaches. *World J Hepatol* 2022;14:570-582.
- S22. Hu C, Tan Q, Zhang Q, et al. Application of interpretable machine learning for early prediction of prognosis in acute kidney injury. *Comput Struct Biotechnol J* 2022;20:2861-2870.
- S23. Zhao X, Lu Y, Li S, et al. Predicting renal function recovery and short-term reversibility among acute kidney injury patients in the ICU: comparison of machine learning methods and conventional regression. *Ren Fail* 2022;44:1326-1337.
- S24. Alfieri F, Ancona A, Tripepi G, et al. A deep-learning model to continuously predict severe acute kidney injury based on urine output changes in critically ill patients. *J Nephrol* 2021;34:1875-1886.
- S25. Li M, Zhuang Q, Zhao S, et al. Development and deployment of interpretable machine-learning model for predicting in-hospital mortality in elderly patients with acute kidney disease. *Ren Fail* 2022;44:1886-1896.
- S26. Yang Y, Xiao W, Liu X, Zhang Y, Jin X, Li X. Machine learning-assisted ensemble analysis for the prediction of acute pancreatitis with acute kidney injury. *Int J Gen Med* 2022;15:5061-5072.
- S27. Chen Q, Zhang Y, Zhang M, Li Z, Liu J. Application of machine learning algorithms to predict acute kidney injury in elderly orthopedic postoperative patients. *Clin Interv Aging* 2022;17:317-330.
- S28. Jiang X, Hu Y, Guo S, Du C, Cheng X. Prediction of persistent acute kidney injury in postoperative intensive care unit patients using integrated machine learning: a retrospective cohort study. *Sci Rep* 2022;12:17134.
- S29. Yue S, Li S, Huang X, et al. Machine learning for the prediction of acute kidney injury in patients with sepsis. *J Transl Med* 2022;20:215.
- S30. Sun S, Annadi RR, Chaudhri I, et al. Short- and long-term recovery after moderate/severe AKI in patients with and without COVID-19. *Kidney360* 2021;3:242-257.
- S31. Huang S, Teng Y, Du J, Zhou X, Duan F, Feng C. Internal and external validation of machine learning-assisted prediction models for mechanical ventilation-associated severe acute kidney injury. *Aust Crit Care* 2023;36:604-612.
- S32. Su Y, Zhang YJ, Tu GW, et al. Furosemide responsiveness predicts acute kidney injury progression after cardiac surgery. *Ann Thorac Surg* 2024;117:432-438.
- S33. Altarelli M, Jreige M, Prior JO, Nicod Lalonde M, Schneider AG. Renal scintigraphy to predict persistent renal failure after acute kidney injury: an observational study. *J Nephrol* 2023;36:1047-1058.
- S34. Rice ML, Barreto EF, Rule AD, et al. Development and validation of a model to predict acute kidney injury following high-dose methotrexate in patients with lymphoma. *Pharmacotherapy* 2024;44:4-12.
- S35. Zulu C, Mwaba C, Wa Somwe S. The renal angina index accurately predicts low risk of developing severe acute kidney injury among children admitted to a low-resource pediatric intensive care unit. *Ren Fail* 2023;45:2252095.
- S36. Zheng L, Lin Y, Fang K, Wu J, Zheng M. Derivation and validation of a risk score to predict acute kidney injury in critically ill cirrhotic patients. *Hepatol Res* 2023;53:701-712.
- S37. Wei W, Cai Z, Chen L, Yuan W, Fan Y, Rong S. Short-term prognostic models for severe acute kidney injury patients receiving prolonged intermittent renal replacement therapy based on machine learning. *BMC Med Inform Decis Mak* 2023;23:133.
- S38. Fan Z, Jiang J, Xiao C, et al. Construction and validation of prognostic models in critically ill patients with sepsis-associated acute kidney injury: interpretable machine learning



- approach. *J Transl Med* 2023;21:406.
- S39. Li X, Wu R, Zhao W, et al. Machine learning algorithm to predict mortality in critically ill patients with sepsis-associated acute kidney injury. *Sci Rep* 2023;13:5223.
- S40. Wei S, Zhang Y, Dong H, et al. Machine learning-based prediction model of acute kidney injury in patients with acute respiratory distress syndrome. *BMC Pulm Med* 2023;23:370.
- S41. Yang J, Peng H, Luo Y, Zhu T, Xie L. Explainable ensemble machine learning model for prediction of 28-day mortality risk in patients with sepsis-associated acute kidney injury. *Front Med (Lausanne)* 2023;10:1165129.
- S42. Peng C, Yang F, Li L, et al. A machine learning approach for the prediction of severe acute kidney injury following traumatic brain injury. *Neurocrit Care* 2023;38:335-344.
- S43. Ma Z, Liu W, Deng F, et al. An early warning model to predict acute kidney injury in sepsis patients with prior hypertension. *Heliyon* 2024;10:e24227.
